# Supplementary material for: Chronological adhesive cardiac patch for synchronous mechanophysiological monitoring and electrocoupling therapy
Source: PubMed Central journal article supplement (PMC10558550; doi:10.1038/s41467-023-42008-9), 2023-10-06
Supplement: 41467_2023_42008_MOESM3_ESM.pdf [file 41467_2023_42008_MOESM3_ESM.pdf]

Title: Supplementary Movie 1

Description: Conducting polymer dispersion permeation through the filter membrane.

Title: Supplementary Movie 2

Description: Rapid selfhealing of the CAHP.
